1 **Considering variance in pollinator responses to stressors**  
2 **can reveal potential for resilience**

3

4 Amélie Cabirol<sup>1\*</sup>, Tamara Gómez-Moracho<sup>2\*</sup>, Coline Monchanin<sup>2,3\*</sup>, Cristian Pasquaretta<sup>2</sup>,  
5 Mathieu Lihoreau<sup>2</sup>

6

7 <sup>1</sup> Department of Fundamental Microbiology, University of Lausanne, Lausanne, Switzerland

8 <sup>2</sup> Research Center on Animal Cognition (CRCA), Center for Integrative Biology (CBI); CNRS,  
9 University Paul Sabatier – Toulouse III, France

10 <sup>3</sup> Department of Biological Sciences, Macquarie University, Sydney, Australia

11 \* These authors contributed equally to the work

12 Corresponding author: [mathieu.lihoreau@univ-tlse3.fr](mailto:mathieu.lihoreau@univ-tlse3.fr)

13

14

15

16

17 **Abstract**

18 1. Environmental stressors have sublethal consequences on animals, often affecting the  
19 mean of phenotypic traits in a population. However, potential effects on variance are  
20 poorly understood. Since phenotypic variance is the basis for adaptation, any  
21 influence of stressors may have important implications for population resilience.

22 2. Here we explored this possibility in insect pollinators by analysing raw datasets from  
23 24 studies (6,913 bees) in which individuals were first exposed to stressors and then  
24 tested for cognitive tasks.

25 3. While all types of stressors decreased the mean cognitive performance of bees, their  
26 effect on variance was complex. Focusing on 15 pesticide studies, we found that the  
27 dose and the mode of exposure to stressors were critical. At low pesticide doses,  
28 cognitive variance decreased following chronic exposures but not for acute  
29 exposures. Acute exposure to low doses thus seems less damaging at the population  
30 level. In all cases however, the variance decreased with increasing doses.

31 4. *Policy implications.* Current guidelines for the authorization of plant protection  
32 products on the European market prioritize acute over chronic toxicity assessments  
33 on non-target organisms. By overlooking the consequences of a chronic exposure,  
34 regulatory authorities may register new products that are harmful to bee populations.  
35 Our findings thus call for more research on stress-induced phenotypic variance and  
36 its incorporation to policy guidelines to help identify levels and modes of exposure  
37 animals can cope with.

38

39 **Keywords:** *Apis cerana*, *Apis mellifera*, *Bombus impatiens*, *Bombus terrestris*, cognition,  
40 inter-individual variability, pesticides, pollinators

41

42

## 43 **Introduction**

44 Human activities have led to a dramatic increase in the extinction rates of animal species  
45 (Barnosky *et al.*, 2011; Dirzo *et al.*, 2014; Wagner, 2020). Associated stressors have partly  
46 been identified and act synergistically (Brook, Sodhi and Bradshaw, 2008; Dirzo *et al.*, 2014;  
47 Sánchez-Bayo and Wyckhuys, 2019; Siviter *et al.*, 2021). These include habitat loss,  
48 pollutions, and the introduction of invasive species. These factors add up to the ones  
49 naturally encountered by animals in their environment, such as the presence of predators,  
50 pathogens, and parasites. Given the raising number of species threatened with extinction  
51 (Barnosky *et al.*, 2011; Sánchez-Bayo and Wyckhuys, 2019), it has become urgent to  
52 understand how animal populations can cope with human-induced stressors in order to orient  
53 policies towards an efficient regulation of activities affecting the biodiversity.

54 Many of these stressors do not kill animals, but nevertheless significantly impact their  
55 fitness through inaccurate behaviour or reduced reproduction (Klein *et al.* 2017). Measuring  
56 these sublethal effects of stressors on populations is difficult because of the technical  
57 challenge of monitoring large numbers of animals and tease apart the many confounding  
58 factors linked to field conditions. Most studies have thus focused on the effects of stressors  
59 on individual animals using controlled laboratory setups to measure single phenotypic traits,  
60 such as cognition or reproduction (Badyaev 2005). Yet, the relevance of such risk  
61 assessment methods compared to field population-level studies has been questioned as  
62 mismatching conclusions often emerged from the two approaches (Thompson and Maus,  
63 2007; Henry *et al.*, 2015). Even though stressors may affect individual phenotypic traits in the  
64 lab, life in a natural, sensory, and socially enriched environment can buffer or amplify these  
65 effects (Wright and Conrad, 2008; Henry *et al.*, 2015; Lambert *et al.*, 2016; Cabirol *et al.*,  
66 2017).

67 Studies investigating the impact of stressors on phenotypic traits often report shifts in  
68 their means at the population level. Agrochemicals, for instance, were shown to reduce food  
69 consumption and delay migration in songbirds (Eng, Stutchbury and Morrissey, 2019), to

70 alter endocrine functions in amphibians and fish (Mann *et al.*, 2009; Besson *et al.*, 2020), and  
71 to reduce learning performance in bees (Siviter *et al.*, 2018). We therefore argue that  
72 studying how stressors affect the variance of these traits will provide important  
73 complementary information about the severity of stressors on animal populations and may  
74 reconcile results obtained in the lab and in the field.

75         It is well recognized that animals exhibit variability in behavioural and physiological  
76 responses to stressors (Ebner and Singewald, 2017; Mazza *et al.*, 2019). Some individuals  
77 may better cope with particular stressors than others. Thus understanding how this variance  
78 in stress-response is affected at the population level is crucial for risk assessment  
79 (Nakagawa *et al.* 2015). If the variance is low in the population following stressor exposure,  
80 all individuals may suffer the consequences associated with the altered phenotype. On the  
81 contrary, if the variance remains high in the population, even though the mean is affected,  
82 some individuals may still exhibit an adaptive phenotype. In some cases, stressors may even  
83 increase phenotypic variance, a phenomenon suggested to promote the evolutionary  
84 diversification of species (Badyaev, 2005). Stressors act as agents of selection and stress-  
85 induced variation should therefore be considered when assessing the resilience of a  
86 population to a particular stressor (Hoffmann and Merilä, 1999).

87         Here we highlight the importance of studying the phenotypic variance in animal  
88 populations exposed to stressors. To support this claim, we analysed the effect of stressors  
89 on the mean and variance of cognitive performances in bees. We focused on honey bees  
90 (*Apis*) and bumblebees (*Bombus*), as they are arguably the most studied pollinators. They  
91 are also known to be affected by multiple natural and human-induced stressors, and in  
92 particular pesticides (Potts *et al.*, 2010; Goulson *et al.*, 2015). Honey bees and bumblebees  
93 live in colonies with a division of labour and are therefore characterized by an important level  
94 of inter-individual behavioural and cognitive variability (Jeanson and Weidenmüller, 2014).  
95 Foragers, in particular, have evolved a rich cognitive repertoire enabling them to locate and  
96 recognise plant resources, handle them, and navigate back to their hive to unload food for

97 the colony (Chittka, 2017). One of the most reported sublethal effect of stressors on bees is  
98 the decrease in their cognitive performance (learning and memory), which has been  
99 associated with a decreased foraging success and colony survival (Klein *et al.*, 2017). A  
100 recent meta-analysis confirmed that exposure to neonicotinoid pesticides at field-realistic  
101 doses, either in acute or chronic exposure, consistently alter the mean olfactory learning and  
102 memory performance of bees (Siviter *et al.*, 2018). However, the impact of stressor intensity  
103 (dose and duration) on the variance of the learning performance was not analysed. We  
104 therefore explored these effects by analysing the raw datasets from 24 studies that assessed  
105 bee cognition applying olfactory and visual learning protocols in either an appetitive or  
106 aversive context. Although a decreased cognitive performance was expected in stressed  
107 bees, we predicted that the effect of stressors on the variance would depend on the stressor  
108 intensity, which would help estimate the hazardous nature of a given stressor.

109

## 110 **Materials and methods**

111

### 112 ***Search and selection of datasets***

113 The search for scientific publications falling within the scope of our research question was  
114 performed in July 2020 using the PubMed database. The keywords used for the search were  
115 (“Stressor” OR “Pesticide” OR “Parasite”) AND (“Cognition” OR “Learning”) AND  
116 (“Pollinators” OR “Bees”). A total of 71 studies were found, of which 22 met our inclusion  
117 criteria. Two datasets belonging to the authors of this study were also included as they filled  
118 the inclusion criteria. These studies measured the impact of stressors on the cognitive  
119 performance of bees. A summary of the studies is given a Table 1.

120

121 **Cognitive tasks.** We focused on cognitive data from bees exposed to stressors during their  
122 adult life, as bees treated as larvae might be more sensitive to stressors (i.e. pesticides;

123 Siviter et al. 2018) Thus, this kind of data was not considered in our analyses (see Smith et  
124 al. 2020 and Tan et al. 2015). Briefly, in all these studies, cognitive performance was  
125 assessed using associative learning paradigms testing the ability of bees to associate an  
126 olfactory or/and a visual stimulus with an appetitive or aversive reinforcement (Giurfa, 2007).  
127 Olfactory learning was tested in 9 out of the 24 studies. These studies used olfactory learning  
128 protocols with appetitive conditioning of the extension of the proboscis of bees (PER; 17  
129 studies) or aversive conditioning of the sting extension (SER; 2 studies). Either response was  
130 conditioned by presenting bees a conditioned stimulus (an odour) paired with an  
131 unconditioned stimulus (a reward of sucrose solution or an electric shock), for 3-15 trials in  
132 appetitive assays and 5-6 trials in aversive assays. Trainings included absolute learning (the  
133 odour is reinforced) and differential learning (an odour is reinforced, the other is not). Visual  
134 learning was tested in 5 out of 24 the studies. These studies used visual learning protocols  
135 with appetitive conditioning in a Y-maze (1 study) or on artificial flowers (1 study), or aversive  
136 conditioning with electric shocks (1 study). One of these studies applied a multimodal  
137 appetitive conditioning combining both odour and colour cues to be learnt by bees in an array  
138 of artificial flowers (Muth et al. 2019). Here again bees were tested for differential learning.  
139 The last study included a test of social recognition when placed with a conspecific (Shepherd  
140 et al. 2019).

141

142 **Stressors.** The stressor type covered different pesticides, parasites, predator odours, alarm  
143 pheromones, and heavy metal pollutants. Studies performed with pesticides whose median  
144 lethal dose (LD50; i.e. dose that kills 50% of the population) could not be identified in the  
145 literature were excluded from our final selection.

146

147 **Exposure duration.** In all these studies, stressors were applied before the cognitive tests,  
148 except in two studies in which it was used as the CS during conditioning (i.e. petrol exhaust  
149 (Leonard et al. 2019), alarm and predator pheromones (Wang et al. 2016)). We categorised

150 the duration of exposure using the common dichotomy between acute and chronic  
151 treatments. An acute treatment was characterized by a single administration of the pesticide  
152 to each individual bee. When bees were exposed to the pesticide more than once, either as  
153 a substance present in their environment or as a food directly offered to each individual, the  
154 exposure type was considered chronic.

155

156 **Bee genus.** The bee species studied in the selected publications were the honey bees *Apis*  
157 *cerana* and *Apis mellifera*, and the bumblebees *Bombus impatiens* and *Bombus terrestris*.  
158 These species were not selected purposefully, but rather emerged from the refinement  
159 obtained with other inclusion criteria. All but three raw datasets were available online with the  
160 published material. Those three datasets were kindly provided by their authors. The list of the  
161 24 selected studies is available in Table 1. The raw data are provided in Dataset S1.

162

| <b>Stressor</b> | <b>Genus</b>        | <b>Exposure type</b> | <b>Reference</b>                 |
|-----------------|---------------------|----------------------|----------------------------------|
| Pesticide       | <i>Apis</i>         | Acute                | (Ludicke and Nieh, 2020)         |
| Pesticide       | <i>Apis</i>         | Acute                | (Hesselbach and Scheiner, 2018)  |
| Pesticide       | <i>Apis</i>         | Acute                | (Urlacher <i>et al.</i> , 2016)  |
| Pesticide       | <i>Apis</i>         | Acute,               | (Tan <i>et al.</i> , 2015)       |
| Pesticide       | <i>Apis</i>         | Chronic              | (Mustard <i>et al.</i> , 2020)   |
| Pesticide       | <i>Apis</i>         | Chronic              | (Tan <i>et al.</i> , 2017)       |
| Pesticide       | <i>Apis, Bombus</i> | Acute                | (Siviter <i>et al.</i> , 2019)   |
| Pesticide       | <i>Bombus</i>       | Acute                | (Muth <i>et al.</i> , 2019)      |
| Pesticide       | <i>Bombus</i>       | Acute, chronic       | (Stanley, Smith and Raine, 2015) |
| Pesticide       | <i>Bombus</i>       | Chronic              | (Smith <i>et al.</i> , 2020)     |
| Pesticide       | <i>Bombus</i>       | Chronic              | (Lämsä <i>et al.</i> , 2018)     |

|                          |                     |               |                                                |
|--------------------------|---------------------|---------------|------------------------------------------------|
| Pesticide                | <i>Bombus</i>       | Chronic       | (Phelps <i>et al.</i> , 2018)                  |
| Pesticide,<br>coexposure | <i>Apis</i>         | Chronic       | (Colin, Plath, <i>et al.</i> , 2020)           |
| Parasite                 | <i>Bombus</i>       | Acute         | Gomez-Moracho <i>et al.</i> (2021)             |
| Parasite                 | <i>Bombus</i>       | Acute         | (Martin, Fountain and Brown, 2018)             |
| Pollution                | <i>Apis</i>         | Acute         | Monchanin <i>et al.</i> (unpublished)          |
| Pollution                | <i>Apis</i>         | Acute         | (Monchanin, Drujont, <i>et al.</i> , 2021)     |
| Pollution                | <i>Apis</i>         | Acute         | (Leonard <i>et al.</i> , 2019)                 |
| Pollution                | <i>Apis</i>         | Chronic       | (Monchanin, Blanc-brude, <i>et al.</i> , 2021) |
| Other                    | <i>Apis</i>         | Acute         | (Wang <i>et al.</i> , 2016)                    |
| Other                    | <i>Apis</i>         | Acute         | (Shepherd <i>et al.</i> , 2018)                |
| Other                    | <i>Apis</i>         | Chronic       | (Shepherd <i>et al.</i> , 2019)                |
| Coexposure               | <i>Apis, Bombus</i> | Acute/Chronic | (Piiroinen and Goulson, 2016)                  |
| Coexposure               | <i>Bombus</i>       | Acute/Chronic | (Piiroinen <i>et al.</i> , 2016)               |

163

#### 164 **Dataset organisation and normalisation of variables**

165 The raw data were downloaded and saved as .csv files. A new dataset (Dataset S1) was  
166 created, which combined information on the species, the cognitive task studied, the type of  
167 stressor, the type of exposure (acute/chronic), and, in the case of pesticide studies, the dose  
168 ( $\mu\text{g}/\text{bee}$ ) or concentration (ppb). Within each study, data were grouped in different categories  
169 according to homogeneous experimental methodologies (i.e. 38 categories).

170 To allow comparison across studies, a z-score was calculated for each individual on  
171 its cognitive performance by applying the function 'scale' in R (package {base}) which uses  
172 the mean and the standard deviation of the sample to scale each element. Within each  
173 study, the function 'scale' was applied on the cognitive performance of bees belonging to the  
174 same category of bee species, cognitive task, stressor type and exposure type. When



175 learning performance was measured as a binary response (e.g. success vs. failure) across  
176 multiple trials, the raw data was first used to calculate a learning score for each individual  
177 corresponding to the number of successful trials. Such a calculation was required because  
178 the variance in binary variables can be mathematically predicted from the mean and sample  
179 size and does not reflect biological variance (Supplementary Fig. S1). For pesticide studies,  
180 the dose (acute exposure) and concentration (chronic exposure) were normalized using the  
181 LD50.

182 Individual z-scores were used to calculate the mean and the variance of the z-scores  
183 for each control and stressed group. We thereafter refer to these variables as the “mean” and  
184 the “variance” of the cognitive performance. Each study may contain multiple control and  
185 stressed groups depending on the number of experiments performed and the number of  
186 stressors used. The final sample sizes are therefore larger than the number of studies and  
187 are displayed on the figures.

188

### 189 ***Data analyses***

190 All analyses were conducted in R Studio v.1.2.5033 (RStudio Team 2015). Linear mixed-  
191 effects models (LMMs; package {lme4}; Bates et al. 2015) were used to investigate the  
192 impact of stressors on the mean and the variance of the cognitive performance. The group  
193 (control vs. stressed), the type of stressor, the species or the type of tasks were defined as  
194 independent variables. The experiment’s identifier was set as random factor.

195 Similar models were used to assess the impact of pesticides on the mean and  
196 variance of the cognitive performance. In the subset of pesticide studies (15 studies),  
197 Pearson correlation tests were also performed to assess the relationship between the mean  
198 and the variance of the cognitive performance within control and stressed groups. LMMs  
199 were conducted to study the influence of the pesticide dose (log-transformed) on individual z-  
200 scores, with the experiment’s identifier set as random factor.

201

## 202 **Results**

203

### 204 ***All stressors reduced the cognitive mean but not the variance***

205 We first explored the overall effects of stress on the cognitive mean and variance of bees  
206 across the 24 studies. As expected from previous studies, the mean cognitive performance  
207 was severely impacted by exposure to stressors (Fig. 1A). Overall, stressed bees exhibited a  
208 significantly lower mean cognitive performance than control bees (LMMs; *group effect*:  $F_{1,90} >$   
209  $15$ ,  $P < 0.001$  for all models) irrespective of the type of stressor they were exposed to  
210 (*group\*stressor effect*:  $F_{4,90} = 0.92$ ,  $P = 0.454$ ; Fig. 1A), the bee genus (*group\*genus effect*:  
211  $F_{1,94} = 1.23$ ,  $P = 0.271$ ; Fig. 1C) and the type of cognitive task (*group\*task effect*:  $F_{3,93} = 0.84$ ,  
212  $P = 0.477$ ; Fig. 1E).

213 The effects of stressors on cognitive variance were less pronounced and more  
214 heterogeneous (Fig. 1B). Variance did not differ significantly between control and stressed  
215 bees (LMMs; *group effect*:  $F_{4,122} < 4.12$ ,  $P > 0.05$  for all models). We found no effect of the  
216 bee genus (*group\*genus effect*:  $F_{1,128} = 0.65$ ,  $P = 0.421$ ; Fig. 1D) nor of the type of cognitive  
217 task (*group\*task effect*:  $F_{3,120} = 0.75$ ,  $P = 0.533$ ; Fig. 1F). There was a significant interaction  
218 between exposure to stressor and the type of stressor, indicating a heterogeneous effect of  
219 stressors on the variance of the cognitive performance (*group\*stressor effect*:  $F_{4,122} = 3.44$ ,  $P$   
220  $= 0.011$ ; Fig. 1B). While variance decreased in stressed bees exposed to pesticides, it  
221 tended to increase in stressed bees exposed to other stressor types, compared to their  
222 respective control group. Thus exposure to stressors globally reduced the cognitive  
223 performances of bees, with mixed effects on variance depending on stressor type.

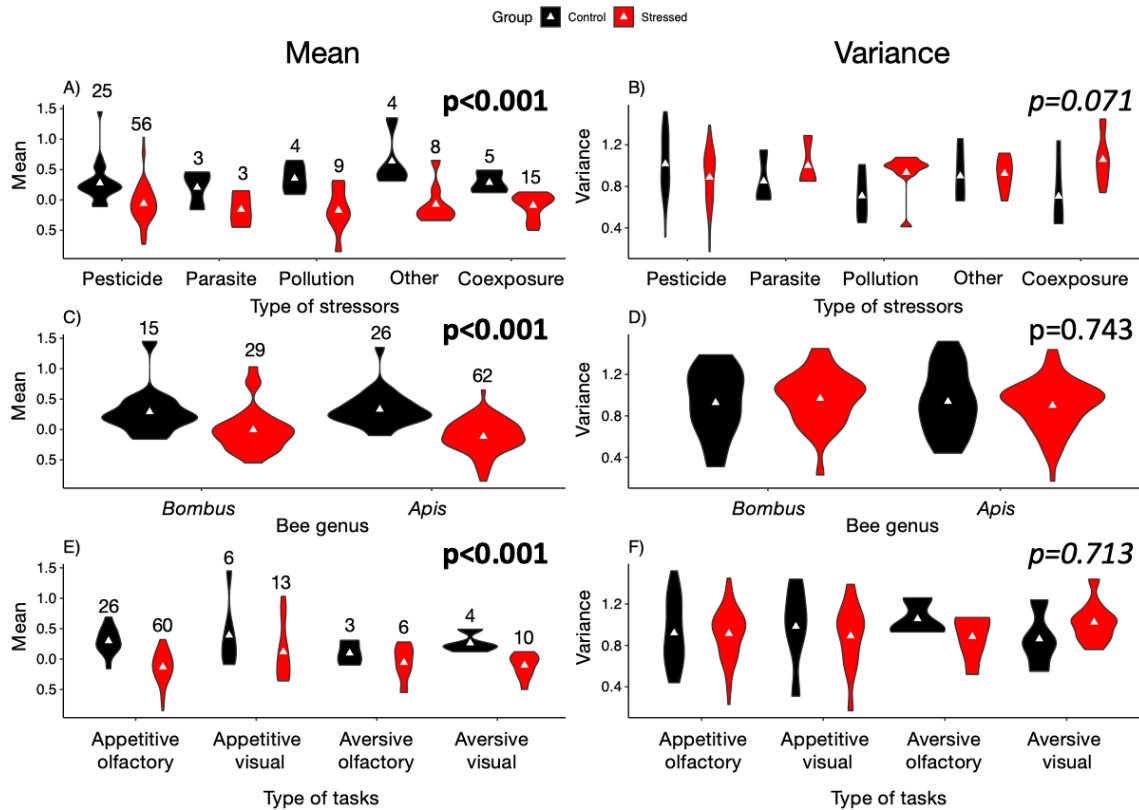

224

225 **Figure 1. Stressors decrease the mean cognitive performance of bees, but not the**  
 226 **variance.** Violin plots showing the mean (left) and the variance (right) of the cognitive  
 227 performance for control (black) and stressed (red) bees are displayed according to: **A-B)** the  
 228 type of stressors; **C-D)** the bee genus; **E-F)** the type of cognitive tasks. White triangles  
 229 represent the mean. Sample sizes are displayed above the violins. P-values from LMM are  
 230 displayed for group effect only and are in bold when significant.

231

232 ***Chronic exposure to pesticides reduced cognitive mean and variance***

233 To investigate whether stressor intensity plays a role in the differential effects of stressors  
 234 observed on the variance of the cognitive performance of bees, we focused our analyses on  
 235 the 15 pesticide studies of our dataset (Table 1). Pesticide studies were the most abundant  
 236 in the literature and present the advantage that a normalization of stressor intensity across

237 drugs was possible using LD50s (amount of substance necessary to kill 50% of individuals in  
238 the population) and durations of exposure (acute or chronic).

239 Both acute and chronic treatments reduced the mean cognitive performance of bees  
240 (Fig. 2; LMM; *acute*:  $F_{1,34} = 5.89$ , estimates±standard error:  $-0.232\pm0.095$ ,  $P = 0.021$ ; *chronic*:  
241  $F_{1,20} = 28.69$ ,  $-0.465\pm0.083$ ,  $P < 0.001$ ). They also tended to reduce the cognitive variance  
242 within populations, although to different extent. Cognitive variance of stressed bees was  
243 significantly lower than that of control bees in the chronic treatments (Fig. 2B;  $F_{1,20} = 10.34$ ,  
244 estimates:  $-0.317\pm0.107$ ,  $P < 0.01$ ) but not in the acute treatments (Fig. 2A;  $F_{1,47} = 0.40$ ,  
245 estimates:  $-0.005\pm0.078$ ,  $P = 0.532$ ). However, we found a positive correlation between the  
246 mean cognitive performance and its variance in both stressed groups (*acute*:  $r = 0.437$ ,  $P <$   
247  $0.01$ ; *chronic*:  $r = 0.657$ ,  $P < 0.005$ ), but not in control groups (*acute*:  $r = 0.057$ ,  $P = 0.868$ ;  
248 *chronic*:  $r = 0.072$ ,  $P = 0.833$ ). This shows pesticides tended to reduce both mean and  
249 variance in the two treatments, but this effect was more pronounced for chronic exposure.

250

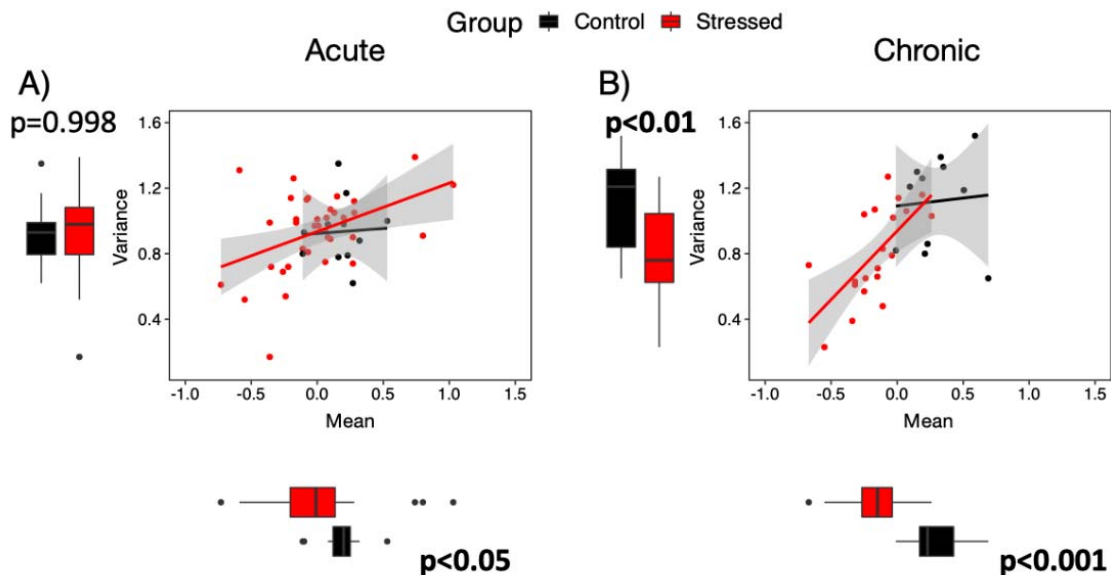

251

252 **Figure 2. Pesticide exposure duration affects the variance of the cognitive**  
253 **performance.** The mean and the variance of the cognitive performance are plotted for

254 control (black) and stressed (red) bees following an **A**) acute (N = 13 controls, N = 36  
255 stressed) or **B**) chronic (N = 11 controls, N = 20 stressed) exposure to pesticides. Horizontal  
256 and vertical boxplots represent the mean cognitive performance and its variance,  
257 respectively. P-values from LMMs are displayed for group effect only and are in bold when  
258 significant.

259

### 260 ***High pesticide doses reduced cognitive mean and variance***

261 To further explore whether the effect on mean and variance differed with stress magnitude,  
262 we analysed different doses and durations of pesticide exposure. A dose-dependent effect  
263 on cognitive performance was found for both acute and chronic exposure (Fig. 3). Cognitive  
264 performances (Individual z-scores) significantly decreased with increasing doses of exposure  
265 (LMM; Fig. 3A, *acute*: estimates =  $-0.144 \pm 0.018$ ,  $P < 0.001$ , Fig. 3B; *chronic*: estimates = -  
266  $0.121 \pm 0.020$ ,  $p < 0.001$ ). Interestingly, both mean and variance decreased with increasing  
267 pesticide doses for acute and chronic exposures (Figs 3C-D). This means most bees in the  
268 population tested seemed to show a decreased cognitive performance following a treatment  
269 with high pesticide doses, irrespective of exposure duration.

270

271

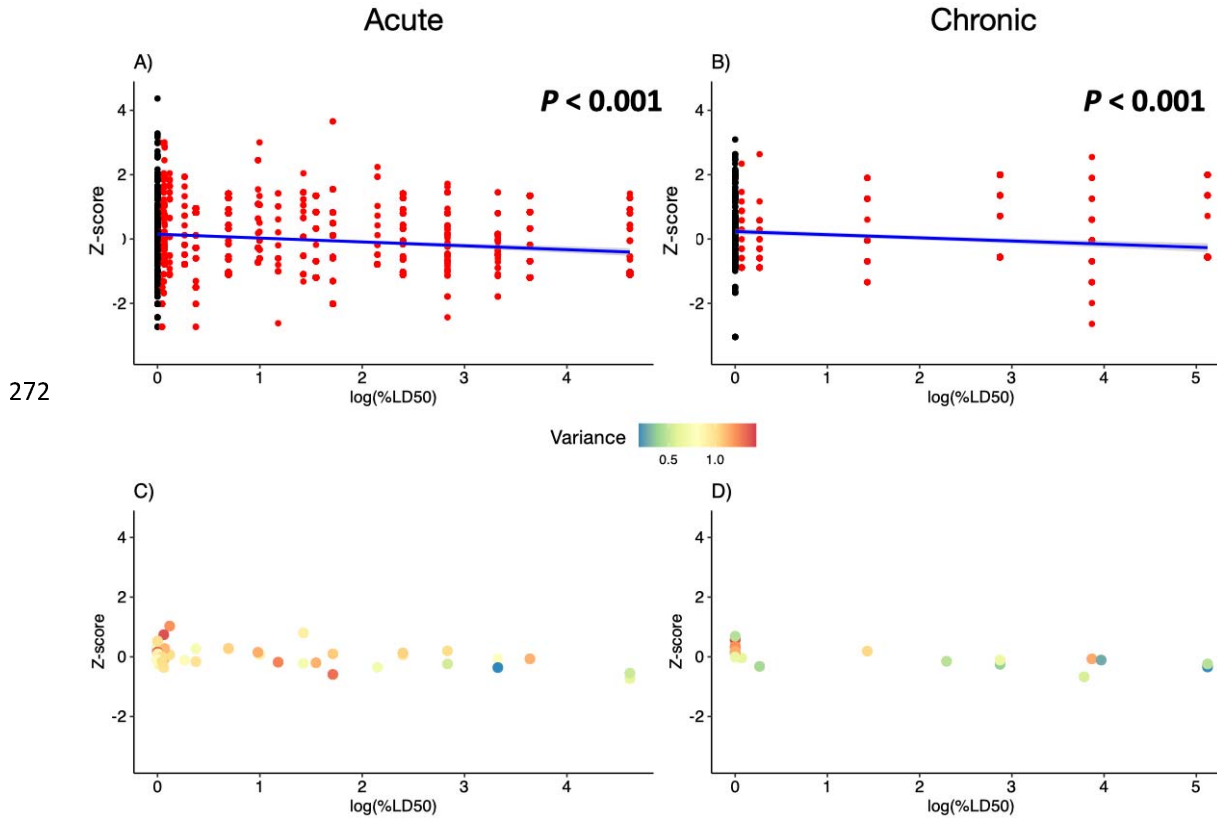

273

274 **Figure 3. Effect of the pesticide dose on cognitive performance.** Individual z-scores are  
275 plotted relative to the normalized pesticide dose (logarithm of %LD50) for **A)** acute exposure  
276 (N = 2,141 bees) and **B)** chronic exposure (N = 1,026 bees). Estimate trends are displayed in  
277 solid blue lines. Plots showing the mean cognitive performance relative to the normalized  
278 pesticide dose (logarithm of %LD50) and coloured according to variance for **C)** acute (N = 13  
279 controls, N = 36 stressed) and **D)** chronic exposure (N = 11 controls, N = 11 stressed).

280

## 281 Discussion

282 Many environmental stressors affect the behaviour and cognition of animals (Killen et al.  
283 2013; Klein et al. 2017; Siviter et al. 2018; Siviter et al. 2021). While studies reporting such  
284 sublethal effects have typically focused on mean phenotypic traits, all individuals in a  
285 population are not similarly affected by stressors, and the resulting phenotypic variance may

286 be critical for stress resilience. Here we tested this hypothesis by analysing raw datasets of  
287 24 bee studies. We showed different effects on the cognitive mean and variance of insects  
288 exposed to stressors, depending on stress level and exposure mode, thus validating the  
289 importance of examining variance in addition to mean phenotypic traits in ecotoxicological  
290 studies.

291 Focusing on pesticide revealed the mean cognitive performance of bees was altered  
292 by both chronic and acute exposures. This result is consistent with a previous meta-analysis  
293 (Siviter *et al.*, 2018). However, the variance in cognitive performance of bees was only  
294 decreased after a chronic exposure. This means some bees were able to better cope than  
295 others with short pesticide exposure, but not to repeated stress. This is, to our knowledge,  
296 the first study showing a differential effect of acute and chronic exposures to a stressor on  
297 learning performance in an animal. Such variance in response to stress might be due to  
298 homeostatic physiological processes that can counteract the effect of an acute exposure to  
299 the drug, which is only present in the body for a short duration (Cohen, 2006). Indeed most  
300 pesticides act on the nervous system of bees whose plasticity to maintain homeostasis is  
301 well-known (Turrigiano and Nelson, 2000; Cabirol and Haase, 2019). For instance, neurons  
302 can compensate a change in the balance between brain excitation and inhibition by  
303 modulating the efficacy of specific synapses (Pozo and Goda, 2010). As neonicotinoids  
304 activate the excitatory cholinergic neurotransmission pathway, one might expect the brain to  
305 counteract this increased excitation (Cabirol and Haase, 2019). However, the lasting  
306 presence of toxic compounds in the bodies during a chronic exposure seems to complicate  
307 the process of resilience to this stressor for most individuals.

308 Interestingly, for both acute and chronic pesticide exposure, the mean cognitive  
309 performance and its variance decreased with increasing doses of toxic compounds. The  
310 positive correlation between the mean and the variance is consistent with this finding: the  
311 more a stressor affects the mean, the more it affects the variance. This advocates for the use  
312 of low pesticide concentrations in the field. Reducing use to doses having sublethal effects

313 on pest insects would still protect crops when pest density is low and thereby would be less  
314 damaging to non-target insects (Colin, Monchanin, *et al.*, 2020).

315 Altogether, our results thus suggest that an acute exposure to low pesticide doses is  
316 the least damaging for bee populations. Indeed, despite the reduced mean cognitive  
317 performance, an unaltered variance of the learning performance following pesticide exposure  
318 means that some individuals may have maintained sufficient cognitive abilities to support  
319 efficient foraging (Klein *et al.*, 2017). Cognitive and behavioural variance is thought to be  
320 particularly important for populations resilience after environmental changes (Jandt *et al.*,  
321 2014) as it augments the probability that some individuals display adapted behaviour to the  
322 new environmental conditions. In group-living species, such as social insects, the high  
323 diversity of behavioural phenotypes within colonies is known to improve the efficiency of  
324 collective decision-making and the ability of groups to find optimal solutions to changing  
325 conditions (Burns and Dyer, 2008; Michelena *et al.*, 2010).

326 In nature, bees often encounter pesticides over long time periods especially when  
327 colonies are located near treated crops and in the hive due to the residues present in the  
328 honey and wax (Godfray *et al.*, 2014, 2015; Tsvetkov *et al.*, 2017). The consequences of  
329 such a chronic exposure to pesticides are often not a priority in risk assessment procedures.  
330 Policy regulations in the European Union and in the US regarding the commercialization of  
331 new plant protection products (PPPs) ask for acute toxicity assays on bees and other non-  
332 target animals before asking for chronic toxicity assays (EPPO, 1992, 2010; U.S.  
333 Environmental Protection Agency and Code of Federal Regulations (CFR), 2010). Only when  
334 acute toxicity is significant would a chronic toxicity assay be performed. Although the  
335 European Food Safety Authority recommends the inclusion of chronic exposure assays  
336 earlier in the risk assessment procedure, such assays are not yet mandatory (EFSA, 2013).  
337 The effects of PPPs that will be encountered chronically in the field might therefore be  
338 underestimated. Note that the fact similar results were obtained in *Bombus* and *Apis*  
339 confirms honey bees are overall suitable surrogates for non-*Apis* species in regulatory risk



340 assessments of pesticide toxicity (Arena and Sgolastra, 2014; Heard *et al.*, 2017; Thompson  
341 and Pamminger, 2019), as currently considered by the European commission (EPPO 2010).  
342 This is true at least when exploring general trends. But these results must then be  
343 complemented on non-*Apis* bee species that may vary in their sensitivity to pesticides (Arena  
344 and Sgolastra, 2014).

345 Overall, our study revealed a differential effect of chronic and acute exposures to  
346 pesticides as well as an important influence of the stressor intensity on the proportion of  
347 individuals that might be impacted. Focusing on variance helped identify acute stress  
348 conditions bees may be able to cope with, which could not be done by looking at the mean  
349 only. Interestingly all types of stressors did not similarly influence bee cognition. While the  
350 mean was severely impacted by all stressors, variance seemed to increase in some non-  
351 pesticide stressors. This positive effect could be triggered by the relatively small sample  
352 sizes found for some stressors ( $N \leq 5$  for the control groups used to assess the effect of  
353 parasites, pollution, and co-exposures). But if it is confirmed, this means stress can favour  
354 the diversification of cognitive abilities (Badyaev, 2005), an observation already made in  
355 rodents where low intensity stressors can have beneficial effects on the cognitive  
356 performance (Hurtubise and Howland, 2016). These intriguing effects of stress on cognitive  
357 traits demonstrate the importance of considering phenotypic variance in future analyses of  
358 the impact of environmental stressors on animals. We hope such approach can be  
359 generalised to assess more thoroughly the hazardous nature of the stressors and identify the  
360 modes of exposure that might be less damaging for wild populations. Future investigations  
361 should also consider the possible interaction between agrochemicals, which have synergistic  
362 effects on bee mortality, but antagonistic effects on behaviour when looking at the mean only  
363 (Siviter *et al.*, 2021). Ultimately the results of such studies should lead to explicit guidelines  
364 for farmers on the safe use of these toxic substances.

365

366 **Authors' contribution**

367 AC, CP and ML designed the study. AC, TGM and CM collected the data. TGM processed  
368 the data and prepared dataset. CM, TGM and CP analysed the data. AC wrote the first draft  
369 of the manuscript. All authors substantially contributed to revisions.

370

### 371 **Acknowledgements**

372 We thank Jacques Gautrais for discussions about mean and variance correlations, and Dara  
373 Stanley and Ken Tan for providing raw data of their studies.

374

### 375 **Conflict of Interest**

376 The authors declare no competing interests.

377

### 378 **Data availability statement**

379 Raw data are available in Dataset S1 (.xlsx file). The data supporting the results will be  
380 archived in Dryad Digital Repository upon publication of the manuscript.

381

### 382 **Fundings**

383 AC has received funding from the European Union's Horizon 2020 research and innovation  
384 programme under the Marie Skłodowska-Curie grant agreement No 892574. CM was funded  
385 by a PhD fellowship from the French Ministry of Higher Education, Research and Innovation  
386 and from Macquarie University. TGM and ML were supported by a grant of the European  
387 Regional Development Found FEDER (MP0021763 - ECONECT), and by an ERC  
388 Consolidator grant (GA101002644 - BEE-MOVE) to ML.

389

### 390 **References**

391 Arena, M. and Sgolastra, F. (2014) 'A meta-analysis comparing the sensitivity of bees to

- 392 pesticides', *Ecotoxicology*, 23, pp. 324–334.
- 393 Badyaev, A. V. (2005) 'Stress-induced variation in evolution: From behavioural plasticity to  
394 genetic assimilation', *Proceedings of the Royal Society B: Biological Sciences*, 272, pp. 877–  
395 886.
- 396 Barnosky, A. D. *et al.* (2011) 'Has the Earth 's sixth mass extinction already arrived?',  
397 *Nature*, 471, pp. 51–57.
- 398 Bates, D. *et al.* (2015) 'Fitting linear mixed-effects models using lme4.', *Journal of Statistical*  
399 *Softwares*, 67, pp. 1–48.
- 400 Besson, M. *et al.* (2020) 'Anthropogenic stressors impact fish sensory development and  
401 survival via thyroid disruption', *Nature Communications*, 11.
- 402 Brook, B. W., Sodhi, N. S. and Bradshaw, C. J. A. (2008) 'Synergies among extinction  
403 drivers under global change', *Trends in Ecology and Evolution*, 23, pp. 453–460.
- 404 Burns, J. G. and Dyer, A. G. (2008) 'Diversity of speed-accuracy strategies benefits social  
405 insects.', *Current biology*, 18, pp. R953-4.
- 406 Cabirol, A. *et al.* (2017) 'Experience during early adulthood shapes the learning capacities  
407 and the number of synaptic boutons in the mushroom bodies of honey bees (*Apis mellifera*)',  
408 *Learning & Memory*, 24, pp. 557–562.
- 409 Cabirol, A. and Haase, A. (2019) 'The neurophysiological bases of the impact of  
410 neonicotinoid pesticides on the behaviour of honey bees.', *Insects*, 10, p. 344.
- 411 Chittka, L. (2017) 'Bee cognition', *Current Biology*, 27, pp. R1049–R1053. doi:
- 412 Cohen, E. (2006) 'Pesticide-mediated homeostatic modulation in arthropods', *Pesticide*  
413 *Biochemistry and Physiology*, 85, pp. 21–27.
- 414 Colin, T., Monchanin, C., *et al.* (2020) 'Pesticide dosing must be guided by ecological  
415 principles', *Nature Ecology and Evolution*, 4, pp. 1575–1577.
- 416 Colin, T., Plath, J. A., *et al.* (2020) 'The miticide thymol in combination with trace levels of the

- 417 neonicotinoid imidacloprid reduces visual learning performance in honey bees (*Apis*  
418 *mellifera*), *Apidologie*, 51, pp. 499–509.
- 419 Dirzo, R. *et al.* (2014) ‘Defaunation in the Anthropocene’, *Science*, 345, pp. 401–406.
- 420 Ebner, K. and Singewald, N. (2017) ‘Individual differences in stress susceptibility and stress  
421 inhibitory mechanisms’, *Current Opinion in Behavioral Sciences*, 14, pp. 54–64.
- 422 EFSA (2013) ‘Guidance on the risk assessment of plant protection products on bees (*Apis*  
423 *mellifera*, *Bombus* spp. and solitary bees)’, *EFSA Journal*, 11.
- 424 Eng, M. L., Stutchbury, B. J. M. and Morrissey, C. A. (2019) ‘A neonicotinoid insecticide  
425 reduces fueling and delays migration in songbirds’, *Science*, 365, pp. 1177–1180.
- 426 EPPO (1992) ‘Guideline on test methods for evaluating the side-effects of plant protection  
427 products on honeybees’, *EPPO Bulletin*, 22, pp. 203–215.
- 428 EPPO (2010) ‘Chapter 10: honeybees.’, *Bulletin OEPP/EPPO Bulletin*, 40, pp. 323–331.
- 429 Giurfa, M. (2007) ‘Behavioral and neural analysis of associative learning in the honeybee: a  
430 taste from the magic well.’, *Journal of comparative physiology. A, Neuroethology, sensory,*  
431 *neural, and behavioral physiology*, 193, pp. 801–24.
- 432 Godfray, H. C. J. *et al.* (2014) ‘A restatement of the natural science evidence base  
433 concerning neonicotinoid insecticides and insect pollinators’, *Proceedings of the Royal*  
434 *Society B*, 281, p. 20140558.
- 435 Godfray, H. C. J. *et al.* (2015) ‘A restatement of recent advances in the natural science  
436 evidence base concerning neonicotinoid insecticides and insect pollinators.’, *Proceedings.*  
437 *Biological sciences / The Royal Society*, 282, p. 20151821.
- 438 Goulson, D. *et al.* (2015) ‘Bee declines driven by combined Stress from parasites, pesticides,  
439 and lack of flowers’, *Science*, 347, p. 1255957.
- 440 Heard, M. S. *et al.* (2017) ‘Comparative toxicity of pesticides and environmental  
441 contaminants in bees: Are honey bees a useful proxy for wild bee species?’, *Science of*

- 442 *the Total Environment*, 578, pp. 357–365.
- 443 Henry, M. *et al.* (2015) 'Reconciling laboratory and field assessments of neonicotinoid toxicity  
444 to honeybees', *Proceedings of the Royal Society B: Biological Sciences*, 282, p. 20152110.
- 445 Hesselbach, H. and Scheiner, R. (2018) 'Effects of the novel pesticide flupyradifurone  
446 (Sivanto) on honeybee taste and cognition', *Scientific Reports*, 8, pp. 1–8.
- 447 Hoffmann, A. and Merilä, J. (1999) 'Heritable variation and evolution under favourable and  
448 unfavourable conditions', *Trends in Ecology and Evolution*, 14, pp. 96–101.
- 449 Hurtubise, J. L. and Howland, J. G. (2016) 'Effects of stress on behavioral flexibility in  
450 rodents', *Neuroscience*, 345, pp. 176–192.
- 451 Jandt, J. M. *et al.* (2014) 'Behavioural syndromes and social insects: personality at multiple  
452 levels.', *Biological reviews of the Cambridge Philosophical Society*, 89, pp. 48–67.
- 453 Jeanson, R. and Weidenmüller, A. (2014) 'Interindividual variability in social insects -  
454 proximate causes and ultimate consequences', *Biological Reviews*, 89, pp. 671–687.
- 455 Killen, S. S. *et al.* (2013) 'Environmental stressors alter relationships between physiology and  
456 behaviour', *Trends in Ecology and Evolution*, 28, pp. 651–658.
- 457 Klein, S. *et al.* (2017) 'Why bees are so vulnerable to environmental stressors', *Trends in  
458 Ecology and Evolution*, 32, pp. 268–278.
- 459 Lambert, K. *et al.* (2016) 'Natural-enriched environments lead to enhanced environmental  
460 engagement and altered neurobiological resilience', *Neuroscience*, 330, pp. 386–394.
- 461 Lämsä, J. *et al.* (2018) 'Low dose of neonicotinoid insecticide reduces foraging motivation of  
462 bumblebees', *Proceedings of the Royal Society B: Biological Sciences*, 285.
- 463 Leonard, R. J. *et al.* (2019) 'Petrol exhaust pollution impairs honey bee learning and  
464 memory', *Oikos*, 128, pp. 264–273.
- 465 Ludicke, J. C. and Nieh, J. C. (2020) 'Thiamethoxam impairs honey bee visual learning,  
466 alters decision times, and increases abnormal behaviors', *Ecotoxicology and Environmental*

- 467 *Safety*, 193, p. 110367.
- 468 Mann, R. M. *et al.* (2009) 'Amphibians and agricultural chemicals: Review of the risks in a  
469 complex environment', *Environmental Pollution*. Elsevier Ltd, 157, pp. 2903–2927.
- 470 Martin, C. D., Fountain, M. T. and Brown, M. J. F. (2018) 'Bumblebee olfactory learning  
471 affected by task allocation but not by a trypanosome parasite', *Scientific Reports*, 8, pp. 1–8.
- 472 Mazza, V. *et al.* (2019) 'Coping with style: individual differences in responses to  
473 environmental variation', *Behavioral Ecology and Sociobiology*, 73, pp. 142.
- 474 Michelena, P. *et al.* (2010) 'Personality and collective decision-making in foraging  
475 herbivores', *Proceedings of the Royal Society B: Biological Sciences*, 277, pp. 1093–1099.
- 476 Monchanin, C., Blanc-brude, A., *et al.* (2021) 'Chronic exposure to trace lead impairs honey  
477 bee learning', *Ecotoxicology and Environmental Safety*, 212, p. 112008.
- 478 Monchanin, C., Drujont, E., *et al.* (2021) 'Heavy metal pollutants have additive negative  
479 effects on honey bee cognition', *Journal of Experimental Biology*, 224, p. jeb241869.
- 480 Mustard, J. A. *et al.* (2020) 'Honeybees fail to discriminate floral scents in a complex learning  
481 task after consuming a neonicotinoid pesticide', *Journal of Experimental Biology*, 223, p.  
482 jeb217174.
- 483 Muth, F. *et al.* (2019) 'Modality-specific impairment of learning by a neonicotinoid pesticide',  
484 *Biology letters*, 15, p. 20190359.
- 485 Nakagawa, S. *et al.* (2015) 'Meta-analysis of variation: Ecological and evolutionary  
486 applications and beyond', *Methods in Ecology and Evolution*, 6, pp. 143–152.
- 487 Phelps, J. D. *et al.* (2018) 'Imidacloprid slows the development of preference for rewarding  
488 food sources in bumblebees (*Bombus impatiens*)', *Ecotoxicology*, 27, pp. 175–187.
- 489 Piironen, S. *et al.* (2016) 'No effect of low-level chronic neonicotinoid exposure on  
490 bumblebee learning and fecundity', *PeerJ*, 2016. 4, pp. e1801.
- 491 Piironen, S. and Goulson, D. (2016) 'Chronic neonicotinoid pesticide exposure and parasite

- 492 stress differentially affects learning in honeybees and bumblebees', *Proceedings of the Royal*  
493 *Society B: Biological Sciences*, 283. pp. 20160246.
- 494 Potts, S. G. *et al.* (2010) 'Global pollinator declines: trends, impacts and drivers.', *Trends in*  
495 *ecology & evolution*, 25, pp. 345–53.
- 496 Pozo, K. and Goda, Y. (2010) 'Unraveling mechanisms of homeostatic synaptic plasticity',  
497 *Neuron*. Elsevier Inc., 66, pp. 337–351.
- 498 RStudio, T. (2015) 'RStudio: integrated development for R.', *RStudio, Inc., Boston, MA*.  
499 Boston, MA: RStudio, Inc., Boston.
- 500 Sánchez-Bayo, F. and Wyckhuys, K. A. G. (2019) 'Worldwide decline of the entomofauna: A  
501 review of its drivers', *Biological Conservation*, 232, pp. 8–27.
- 502 Shepherd, S. *et al.* (2018) 'Extremely low frequency electromagnetic fields impair the  
503 cognitive and motor abilities of Honey bees', *Scientific Reports*, 8, pp. 1–9.
- 504 Shepherd, S. *et al.* (2019) 'Increased aggression and reduced aversive learning in honey  
505 bees exposed to extremely low frequency electromagnetic fields', *PLoS ONE*, 14, pp. 1–13.
- 506 Siviter, H. *et al.* (2018) 'Quantifying the impact of pesticides on learning and memory in  
507 bees', *Journal of Applied Ecology*, 55, pp. 2812–2821.
- 508 Siviter, H. *et al.* (2019) 'No evidence for negative impacts of acute sulfoxaflor exposure on  
509 bee olfactory conditioning or working memory', *PeerJ*, 7, p. e7208.
- 510 Siviter, H. *et al.* (2021) 'Agrochemicals interact synergistically to increase bee mortality',  
511 *Nature*, 596, pp. 389-392.
- 512 Smith, D. B. *et al.* (2020) 'Insecticide exposure during brood or early-adult development  
513 reduces brain growth and impairs adult learning in bumblebees', *Proceedings of the Royal*  
514 *Society B: Biological Sciences*, 287, p. 20192442.
- 515 Stanley, D. A., Smith, K. E. and Raine, N. E. (2015) 'Bumblebee learning and memory is  
516 impaired by chronic exposure to a neonicotinoid pesticide', *Scientific Reports*, 5, pp. 1–10.

- 517 Tan, K. *et al.* (2015) 'A neonicotinoid impairs olfactory learning in Asian honey bees (*Apis*  
518 *cerana*) exposed as larvae or as adults', *Scientific Reports*, 5, p. 10989.
- 519 Tan, K. *et al.* (2017) 'The pesticide flupyradifurone impairs olfactory learning in Asian honey  
520 bees (*Apis cerana*) exposed as larvae or as adults', *Scientific Reports*, 7, pp. 2–10.
- 521 Thompson, H. M. and Maus, C. (2007) 'The relevance of sublethal effects in honey bee  
522 testing for pesticide risk assessment', *Pest Management Science*, 63, pp. 1058–1061.
- 523 Thompson, H. M. and Pamminger, T. (2019) 'Are honeybees suitable surrogates for use in  
524 pesticide risk assessment for non-*Apis* bees?', *Pest Management Science*, 75, pp. 2549–  
525 2557.
- 526 Tsvetkov, N. *et al.* (2017) 'Chronic exposure to neonicotinoids reduces honey bee health  
527 near corn crops', *Science*, 356, pp. 1395–1397.
- 528 Turrigiano, G. G. and Nelson, S. B. (2000) 'Hebb and homeostasis in neuronal plasticity',  
529 *Current Opinion in Neurobiology*, 10, pp. 358–364.
- 530 U.S. Environmental Protection Agency and Code of Federal Regulations (CFR) (2010) 'Title  
531 40 - Pesticide Programs Subchapter E—Pesticide Programs. Part 158—Data Requirements  
532 for Pesticides.', pp. 132–135.
- 533 Urlacher, E. *et al.* (2016) 'Measurements of chlorpyrifos levels in forager bees and  
534 comparison with levels that disrupt Honey bee odor-mediated learning under laboratory  
535 conditions', *Journal of Chemical Ecology*, 42, pp. 127–138.
- 536 Wagner, D. L. (2020) 'Insect declines in the anthropocene', *Annual Review of Entomology*,  
537 65, pp. 457–480.
- 538 Wang, Z. *et al.* (2016) 'Honey bees modulate their olfactory learning in the presence of  
539 hornet predators and alarm component', *PLoS ONE*, 11(2).
- 540 Wright, R. L. and Conrad, C. D. (2008) 'Enriched environment prevents chronic stress-  
541 induced spatial learning and memory deficits', *Behavioural Brain Research*, 187, pp. 41–47.
- 542



543 **Supplementary materials**

544

545

546

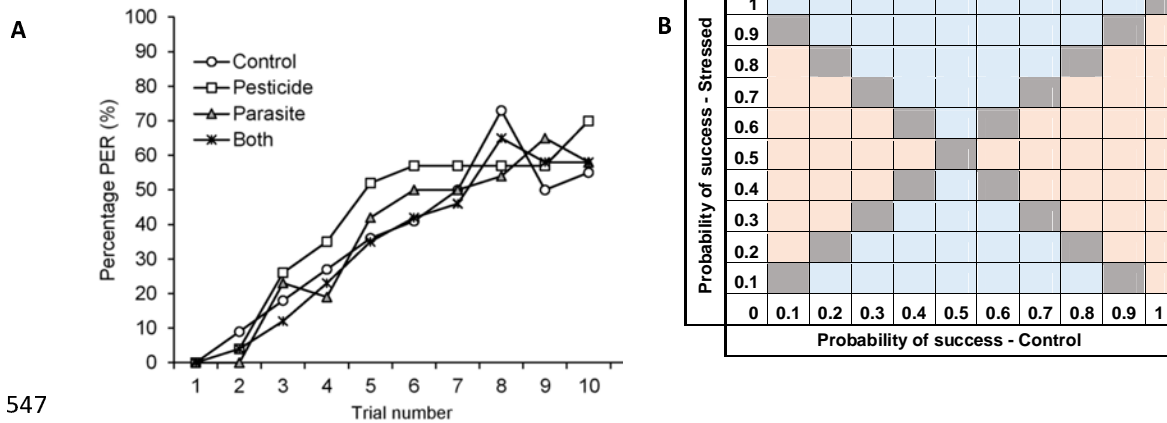

547

548

549 **Supplementary figure S1.** Analysis of variance in studies with binary data. **(A)** Impact of a  
 550 pesticide and parasite on bumblebees' learning performance measured with a classical  
 551 conditioning of the proboscis extension response (PER) (from Piironen et al. 2016). The  
 552 percentage of individuals that extended the proboscis in response to the conditioned stimulus  
 553 (i.e percentage of learners) is plotted across 10 successive learning trials. **(B)** Matrix  
 554 representing the impact of a stressor on the variance in learning performance. For an equal  
 555 sample size in the control and treatment groups, the impact of the treatment on variance can  
 556 be calculated using the mean of each group. An increased (orange) or decreased variance  
 557 (blue) can be predicted.

558

559 **References**

560 Piironen, Saija, Cristina Botías, Elizabeth Nicholls, and Dave Goulson. 2016. "No Effect of  
 561 Low-Level Chronic Neonicotinoid Exposure on Bumblebee Learning and Fecundity."  
 562 *PeerJ* 2016 (3). <https://doi.org/10.7717/peerj.1808>.

563
